# Supplementary material
Source: HighWire-hosted journal article supplement (https://openres.ersjournals.com/content/7/1/00529-2020)
Supplement: inline-supplementary-material-1 [file inline-supplementary-material-1.pdf]

## Supplementary data

### The DIAMORFOSIS (DIagnosis and Management Of lung canceR and FibrOSIS) survey. International survey and call for consensus.

Argyris Tzouvelekis<sup>1</sup>, Katerina Antoniou<sup>2</sup>, Michael Kreuter<sup>3,4</sup>, Matthew Evison<sup>5</sup>, Torsten G Blum<sup>6</sup>, Venerino Poletti<sup>7</sup>, Bogdan Grigoriu<sup>8</sup>, Carlo Vancheri<sup>9</sup>, Paolo Spagnolo<sup>10</sup>, Theodoros Karampitsakos<sup>1</sup>, Francesco Bonella<sup>11</sup>, Athol Wells<sup>12</sup>, Ganesh Raghu<sup>13</sup>, Maria Molina-Molina<sup>14</sup>, Daniel Culver<sup>15</sup>, Elisabeth Bendstrup<sup>16</sup>, Nesrin Mogulkoc<sup>17</sup>, Stefano Elia<sup>18</sup>, Jacques Cadranel<sup>19</sup>, Demosthenes Bouros<sup>20</sup>

<sup>1</sup> Department of Internal and Respiratory Medicine, Medical School University of Patras, Greece; <sup>2</sup>Department of Respiratory Medicine, University of Crete, Greece; <sup>3</sup>Center for Interstitial and Rare Lung Diseases, Pneumology, Thoraxklinik, University of Heidelberg, Heidelberg, Germany; <sup>4</sup>German Center for Lung Research, Heidelberg, Germany; <sup>5</sup>Manchester Thoracic Oncology Centre, Wythenshawe Hospital, Manchester University NHS Foundation Trust, Manchester, UK; <sup>6</sup>Lungenklinik Heckeshorn, Helios Klinikum Emil von Behring, Berlin, Germany; <sup>7</sup> Department of Thoracic Diseases, "GB. Morgagni" Hospital, Forlì, Italy; <sup>8</sup> Service des Soins Intensifs et Urgences Oncologiques & Oncologie thoracique Institut Jules Bordet, Centre des Tumeurs de l'Université Libre de Bruxelles (ULB), Belgium; <sup>9</sup>Regional Referral Centre for Rare Lung Diseases, A. O. U. "Policlinico-Vittorio Emanuele" Dept. Of Clinical and Experimental Medicine, University of Catania, Italy; <sup>10</sup> Respiratory Disease Unit, Department of Cardiac Thoracic, Vascular Sciences and Public Health, University of Padova, Italy; <sup>11</sup> Dept of Pneumology and Allergy, Ruhrlandklinik Medical Faculty, University of Duisburg-Essen, Essen, Germany; <sup>12</sup> Interstitial Lung Disease Unit, Department of Respiratory Medicine, Royal Brompton and Harefield NHS Foundation Trust, London, UK; <sup>13</sup> Center for Interstitial Lung Disease, University of Washington, Seattle, WA, USA; <sup>14</sup> Hospital Universitari de Bellvitge, L'Hospitalet de Llobregat, Barcelona, Spain; <sup>15</sup>Cleveland Clinic, Respiratory Institute, Cleveland, OH, USA; <sup>16</sup>Center for Rare Lung Diseases, Department of Respiratory Diseases and Allergy, Aarhus University Hospital, Denmark; <sup>17</sup>Department of Pulmonology, Faculty of Medicine, Ege University; İzmir-Turkey; <sup>18</sup> Thoracic Surgery Unit, Tor Vergata University, Rome, Italy; <sup>19</sup>Service de Pneumologie, APHP, Hôpital Tenon and Sorbonne Université, Paris, France; <sup>20</sup>First Academic Department of Respiratory Medicine, National and Kapodistrian University of Athens, Greece

#### Correspondence:

Argyris Tzouvelekis MD, MSc, PhD

Associate Professor of Internal and Respiratory Medicine

Medical School, University of Patras, Greece

[argyrios.tzouvelekis@fleming](mailto:argyrios.tzouvelekis@fleming).

Search terminology:

Idiopathic pulmonary fibrosis and lung cancer

idiopathic pulmonary fibrosis and lung cancer medical specialty,

idiopathic pulmonary fibrosis and lung cancer experience,

idiopathic pulmonary fibrosis and lung cancer hospital,

idiopathic pulmonary fibrosis and lung cancer patients,

idiopathic pulmonary fibrosis and lung cancer incidence,

idiopathic pulmonary fibrosis and lung cancer multidisciplinary team,

idiopathic pulmonary fibrosis and lung cancer management,

idiopathic pulmonary fibrosis and lung cancer diagnostic modality,

idiopathic pulmonary fibrosis and lung cancer histologic subtype,

idiopathic pulmonary fibrosis and lung cancer anatomic location,

idiopathic pulmonary fibrosis and lung cancer median latency time of diagnosis,

idiopathic pulmonary fibrosis and lung cancer percentage,

idiopathic pulmonary fibrosis and lung cancer percentage of other cancer,

idiopathic pulmonary fibrosis and lung cancer common type of other malignancy,

idiopathic pulmonary fibrosis and lung cancer contraindication,

idiopathic pulmonary fibrosis and lung cancer radiotherapy,

idiopathic pulmonary fibrosis and lung cancer chemotherapy,

idiopathic pulmonary fibrosis and lung cancer advanced stage,

idiopathic pulmonary fibrosis and lung cancer antifibrotics,

idiopathic pulmonary fibrosis and lung cancer safety precautions,

idiopathic pulmonary fibrosis and lung cancer surgical lung interventions,

idiopathic pulmonary fibrosis and lung cancer surgery,

idiopathic pulmonary fibrosis and lung cancer operable nodule,

idiopathic pulmonary fibrosis and lung cancer metastatic disease,

idiopathic pulmonary fibrosis and lung cancer treatment,

idiopathic pulmonary fibrosis mild to moderate disease,

idiopathic pulmonary fibrosis moderate to severe disease,

lung cancer stage,

idiopathic pulmonary fibrosis and lung cancer mediastinal lymphadenopathy,

idiopathic pulmonary fibrosis and lung cancer diagnostic step,  
idiopathic pulmonary fibrosis and lung cancer diagnosis,  
idiopathic pulmonary fibrosis and lung cancer management,  
idiopathic pulmonary fibrosis and lung cancer consensus statement
